# Supplementary material for: Chiral, fluorescent microparticles constructed by optically active helical substituted polyacetylene: preparation and enantioselective recognition ability
Source: Royal Society of Chemistry journal article supplement (doi:10.1039/c4ra16466k), 2015-01-01
Supplement: c4ra16466k1.pdf [file c4ra16466k1.pdf]

Supporting Information

**Chiral, fluorescent microparticles constructed by optically active helical  
substituted polyacetylene: preparation and enantioselective recognition ability**

Huajun Huang,<sup>1,2</sup> Wantai Yang,<sup>1,2</sup> Jianping Deng<sup>1,2\*</sup>

<sup>1</sup>State Key Laboratory of Chemical Resource Engineering, Beijing University of  
Chemical Technology, Beijing 100029, China

<sup>2</sup>College of Materials Science and Engineering, Beijing University of Chemical  
Technology, Beijing 100029, China

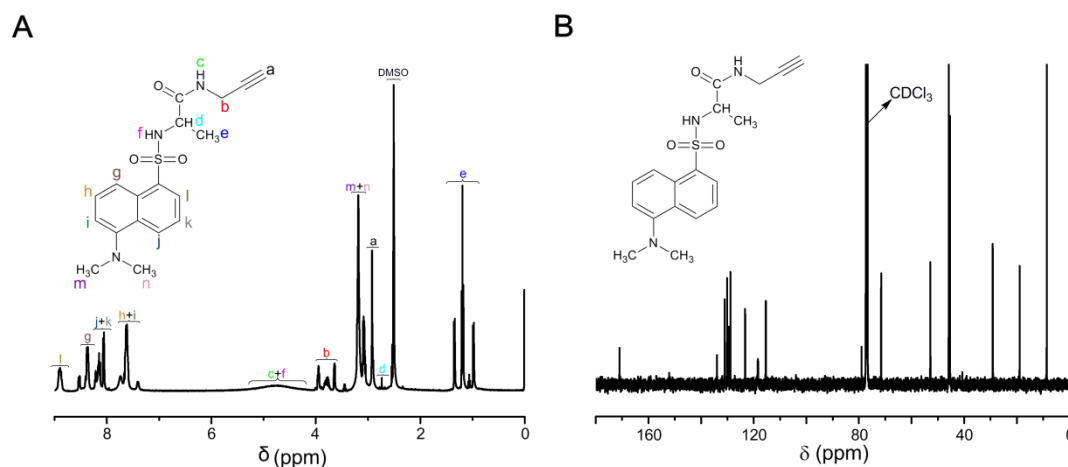

**Figure S1.** NMR spectra of monomer. A, <sup>1</sup>H NMR (measured in DMSO-d<sub>6</sub> at room temperature); B, <sup>13</sup>C NMR (measured in CDCl<sub>3</sub> at room temperature).

<sup>1</sup>H NMR (400 MHz, DMSO-d<sub>6</sub>): δ 8.89 (d, 1H, Ar-H), 8.37 (d, 1H, Ar-H), 8.27–7.97 (m, 2H, Ar-H), 7.88–7.47 (m, 2H, Ar-H), 5.50–4.06 (s, 1H, N-H), 4.02–3.48 (m, 2H, CH<sub>2</sub>N), 3.35–2.99 (m, 6H, N(CH<sub>3</sub>)<sub>2</sub>), 2.92 (s, 1H, HC≡C), 2.74 (t, 1H, HC), 1.37–0.92 (dtd, 3H, CH<sub>3</sub>).

<sup>13</sup>C NMR (100 MHz, CDCl<sub>3</sub>): δ 170.9, 133.8, 130.9, 129.9, 129.8, 129.5, 128.8, 123.3, 118.4, 115.5, 79.0, 71.5, 52.9, 45.8, 29.1, 18.9, 8.6.

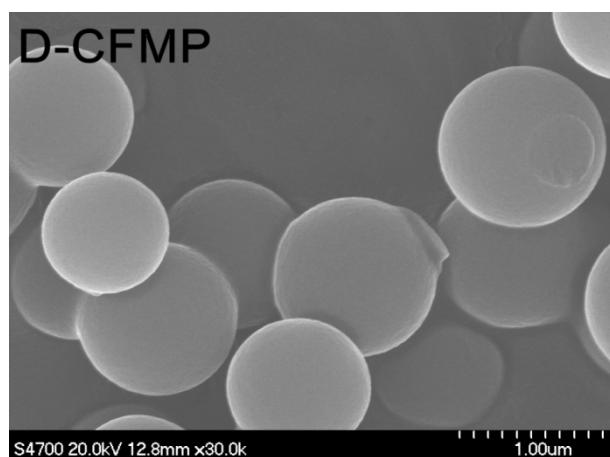

**Figure S2.** SEM image of D-CFMPs prepared in the solvent mixture of  $\text{CHCl}_3$ / *n*-heptane: 3/5 (in ml).

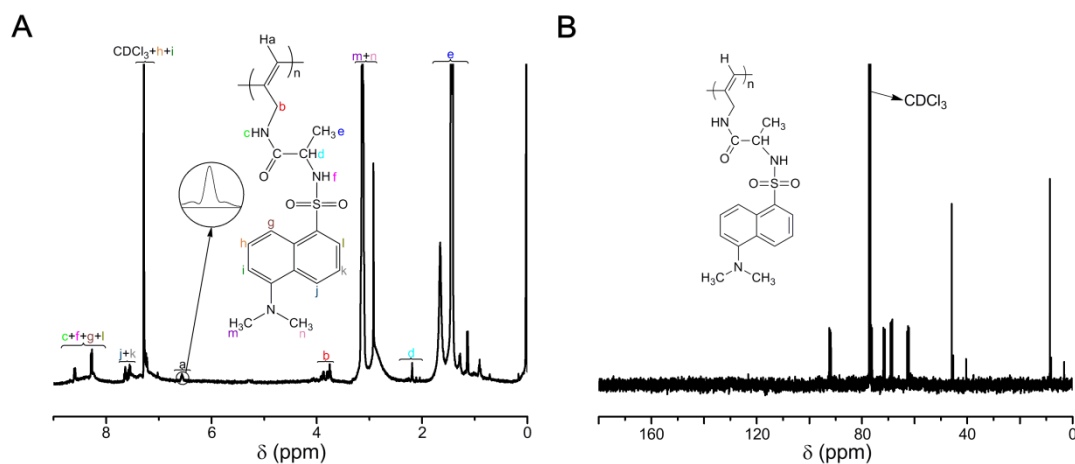

**Figure S3.** Typical  $^1\text{H}$  NMR (A) and  $^{13}\text{C}$  NMR (B) spectra of the chiral fluorescent substituted polyacetylene microparticles (measured in  $\text{CDCl}_3$  at room temperature). A new sharp signal of Ha appeared around 6.5 ppm ( $^1\text{H}$  NMR). According to the ratio of this signal's intensity to that of Hb, the *cis* content of the polymer chains constructing the chiral fluorescent substituted polyacetylene was almost 100%.  $^{13}\text{C}$  NMR (100 MHz,  $\text{CDCl}_3$ ):  $\delta$  92.4, 92.2, 91.8, 77.3, 77.0, 76.7, 76.5, 76.2, 71.9, 71.6, 71.3, 69.1, 68.7, 68.4, 62.9, 62.5, 62.2, 45.9, 45.4, 40.4, 8.6, 8.1.

Elemental analysis: Anal. Calcd for  $\text{C}_{18}\text{H}_{21}\text{N}_3\text{O}_3\text{S}$ : C, 60.15; H, 5.89; N, 11.69; S, 8.92. Found: C, 60.06; H, 5.86; N, 11.73; S, 8.95.

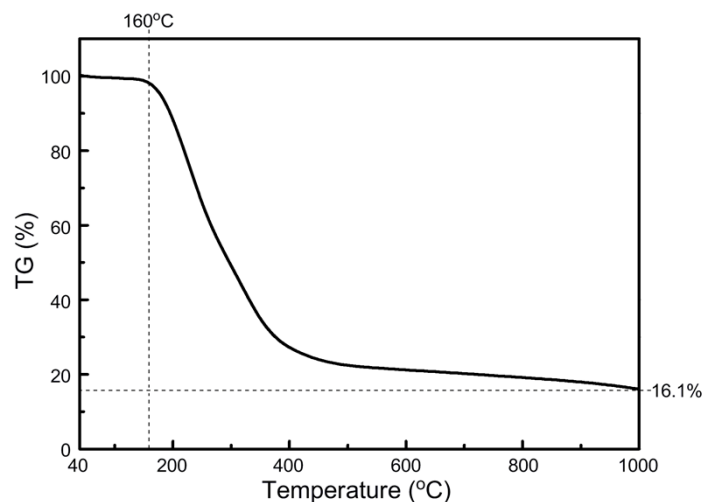

**Figure S4.** TGA curve of the chiral fluorescent microparticles (at a rate of 10 °C /min in N<sub>2</sub>). The polymer chain began to disintegrate at about 160 °C. Approx. 16 wt% of the original mass remained up to 1000 °C.

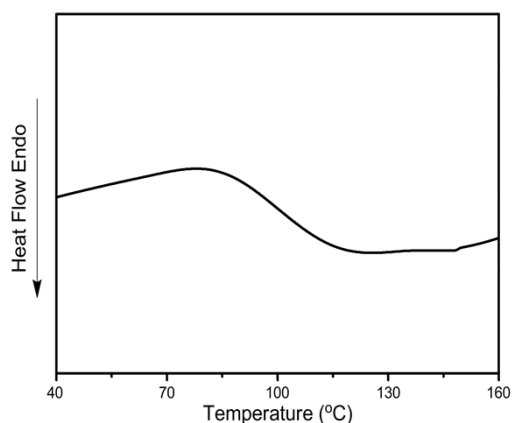

**Figure S5.** DSC thermogram of the chiral fluorescent microparticles measured at a heating rate of 10 °C /min from 40 to 200 °C in N<sub>2</sub>. Tg is determined around 90 °C.

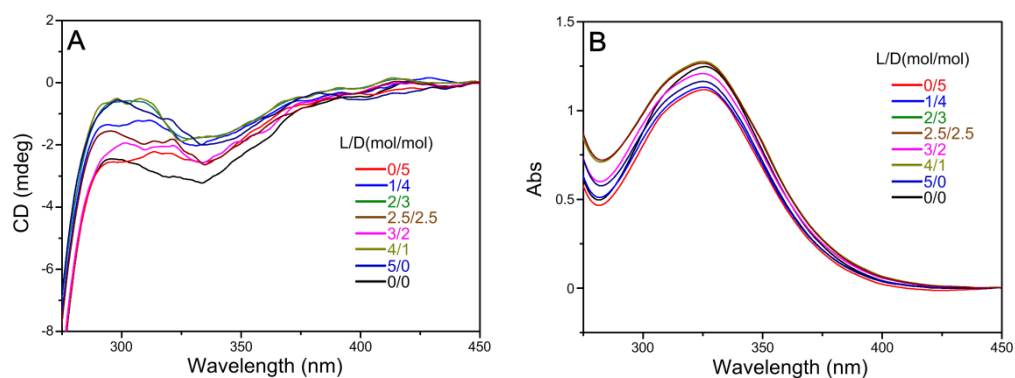

**Figure S6.** CD (A) and UV-vis (B) spectra of L-CFMPs dispersed in water with different ratio of L-alanine/D-alanine: 0/5; 1/4; 2/3; 2.5/2.5; 3/2; 4/1; 5/0; 0/0 (mol/mol). The variation of the change in spectra are considered being due to experimental error.

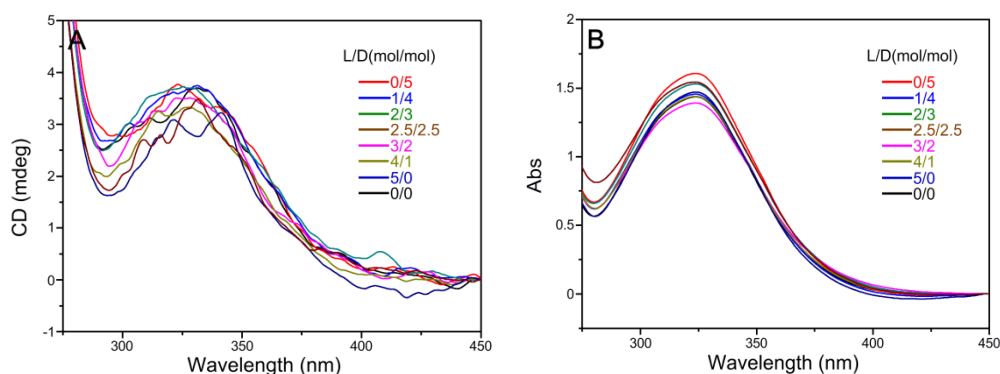

**Figure S7.** CD (A) and UV-vis (B) spectra of D-CFMPs dispersed in water with different ratio of L-/D-alanine: 0/5; 1/4; 2/3; 2.5/2.5; 3/2; 4/1; 5/0; 0/0 (mol/mol).

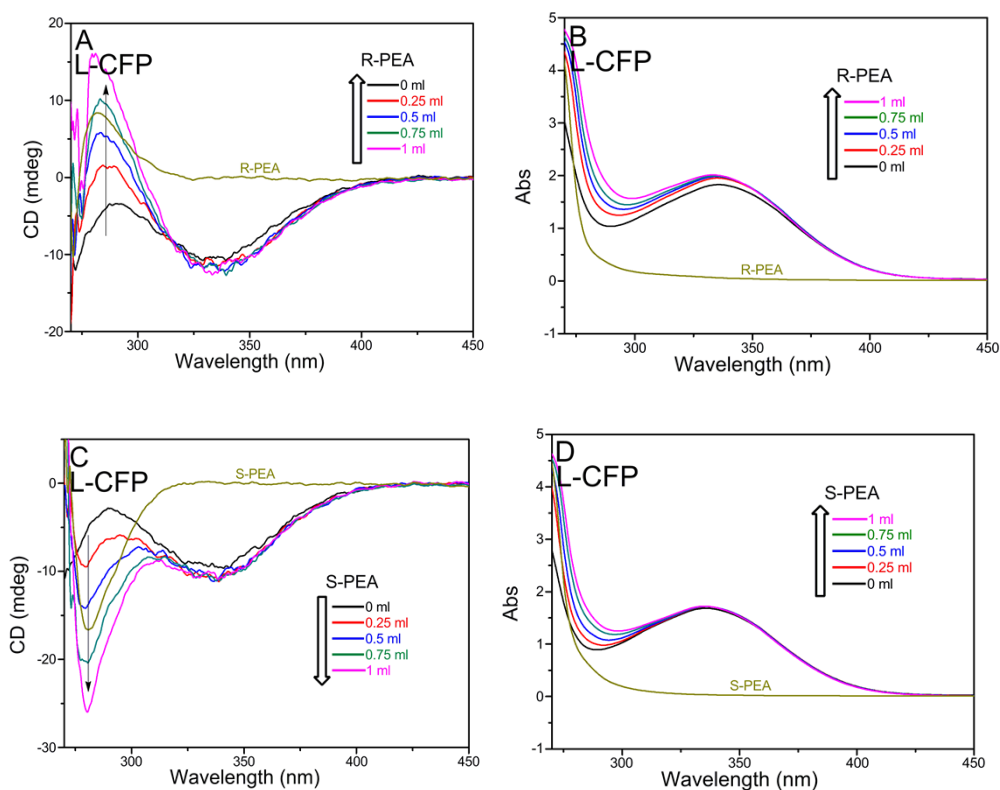

**Figure S8.** CD (A,C) and UV-vis (B,D) spectra of L-CFMPs dissolved in CHCl<sub>3</sub> with different amount of R-PEA and S-PEA: 0; 0.25; 0.5; 0.75; and 1 ml. The CD and UV spectra of R-PEA and S-PEA were measured qualitatively in CHCl<sub>3</sub> to illustrate that the CD signal at around 280 nm was caused by R(S)-PEA.

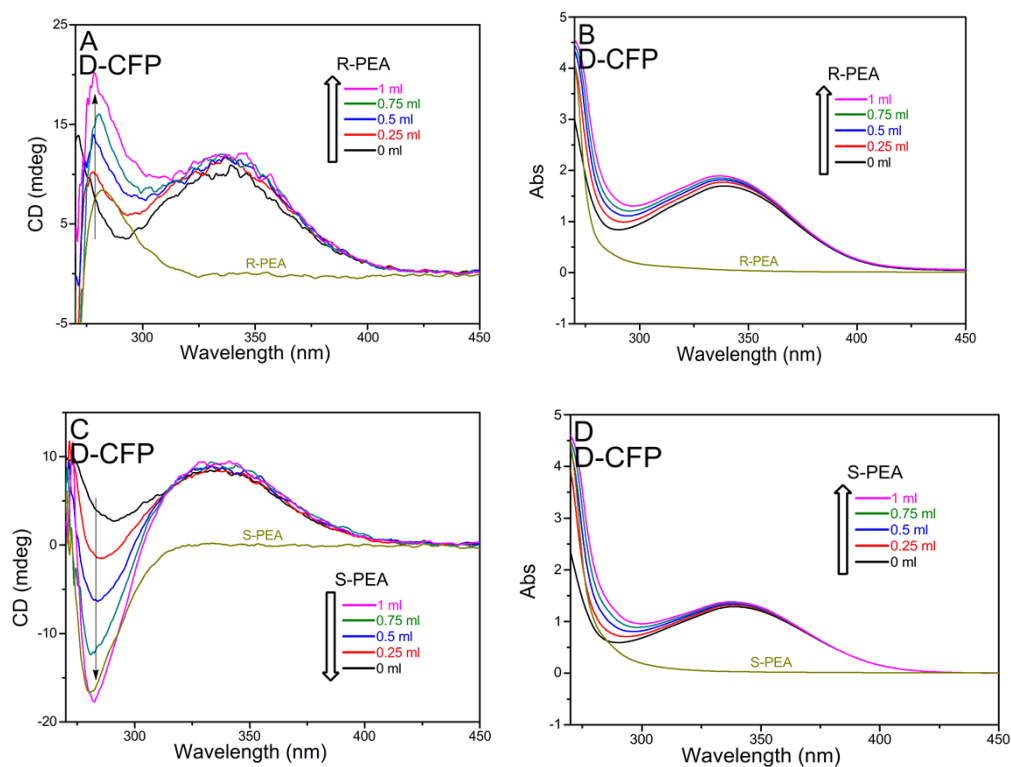

**Figure S9.** CD (A,C) and UV-vis (B,D) spectra of D-CFMPs dissolved in  $\text{CHCl}_3$  with different amount of R-PEA and S-PEA: 0; 0.25; 0.5; 0.75; and 1 ml. The CD and UV spectra of R-PEA and S-PEA were measured qualitatively in  $\text{CHCl}_3$  to illustrate that the CD signal at around 280 nm was caused by R(S)-PEA.

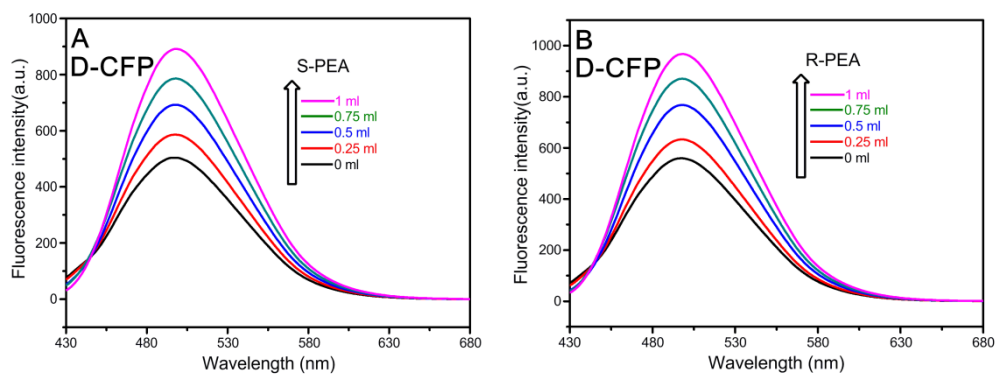

**Figure S10.** Fluorescence emission spectra of chiral fluorescent microparticles (D-CFMPs) dissolved in  $\text{CHCl}_3$  with different amount of R-PEA and S-PEA: 0; 0.25; 0.5; 0.75; and 1 ml.
